# Supplementary material
Source: PubMed Central journal article supplement (PMC9245057)
Supplement: mmc1.pdf [file mmc1.pdf]

**Cell Reports Medicine, Volume 3**

**Supplemental information**

**The IL-1 $\beta$ , IL-6, and TNF cytokine triad  
is associated with post-acute sequelae of COVID-19**

**Christoph Schultheiß, Edith Willscher, Lisa Paschold, Cornelia Gottschick, Bianca Klee, Svenja-Sibylla Henkes, Lidia Bosurgi, Jochen Dutzmann, Daniel Sedding, Thomas Frese, Matthias Girndt, Jessica I. Höll, Michael Gekle, Rafael Mikolajczyk, and Mascha Binder**

**Table S1: Characteristics of participants in the DigiHero „COVID-19“ module, related to Figure 3 – validation cohort**

|                                     | all participants | participants with confirmed prior COVID-19 | Participants without prior COVID-19 |
|-------------------------------------|------------------|--------------------------------------------|-------------------------------------|
| Nb of participants                  | 300              | 240                                        | 60                                  |
| Sex                                 |                  |                                            |                                     |
| Female                              | 171 (57%)        | 143 (59.6%)                                | 28 (46.7%)                          |
| Male                                | 129 (43%)        | 97 (40.4%)                                 | 32 (53.3%)                          |
| Age (years)                         |                  |                                            |                                     |
| Median age                          | 44               | 44.7                                       | 38                                  |
| Range                               | 14-87            | 14-86                                      | 14-87                               |
| Timing of COVID-19 infections       |                  |                                            |                                     |
| Wave 1 (March 2020 -June 2020)      |                  | 6 (2.5%)                                   |                                     |
| Wave 2 (July 2020 - Feb 2021)       |                  | 153 (63.8%)                                |                                     |
| Wave 3 (Mar 2021 - June 2021)       |                  | 63 (26.3%)                                 |                                     |
| Wave 4 (from July 2021)             |                  | 17 (7%)                                    |                                     |
| Not evaluated                       |                  | 1 (0.4%)                                   |                                     |
| Self rated acute infection severity |                  |                                            |                                     |
| asymptomatic                        |                  | 15 (6.3%)                                  |                                     |
| mild to moderate                    |                  | 208 (86.7%)                                |                                     |
| severe                              |                  | 16 (6.6%)                                  |                                     |
| Not evaluated                       |                  | 1 (0.4%)                                   |                                     |
| Hospitalization                     |                  | 8 (3%)                                     |                                     |
| Intensive care unit                 |                  | 0                                          |                                     |
| Duration of symptoms                |                  |                                            |                                     |
| not evaluated                       |                  | 18 (7.5%)                                  |                                     |
| 0-4 weeks                           |                  | 75 (31.3%)                                 |                                     |
| 4-12 weeks                          |                  | 29 (12%)                                   |                                     |
| >12 weeks                           |                  | 118 (49.2%)                                |                                     |
| Nb of SARS-COV-2 vaccinations       |                  |                                            |                                     |
| 0                                   |                  | 30 (12.5%)                                 | 7 (11.7%)                           |
| 1                                   |                  | 129 (53.75%)                               | 6 (10%)                             |
| 2                                   |                  | 81 (33.75%)                                | 47 (78.3%)                          |
| Type of SARS-CoV-2 vaccine          |                  |                                            |                                     |
| not evaluated                       |                  | 13 (6.2%)                                  | 5 (9.4%)                            |
| mRNA vaccine*                       |                  | 122 (58.1%)                                | 4 (7.55%)                           |
| mRNA vaccine + mRNA vaccine         |                  | 53 (25.2%)                                 | 31 (58.5%)                          |
| vector vaccine*                     |                  | 7 (3.3%)                                   | 2 (3.8%)                            |
| vector vaccine + vector vaccine     |                  | 5 (2.4%)                                   | 4 (7.55%)                           |
| vector vaccine + mRNA vaccine       |                  | 10 (4.8%)                                  | 7 (13.2%)                           |

\* mRNA vaccines: Comirnaty (BioNTech / Pfizer) or Spikevax (Moderna Biotech),  
vector vaccines: Vaxzevria (AstraZeneca) or Ad26.COVID-19-S (Johnson&Johnson)

**Table S2: Duration of symptoms, related to Figure 3 – validation cohort**

|                                  | < 4w |       | 4-12w |        | >12w |        | ongoing |       |
|----------------------------------|------|-------|-------|--------|------|--------|---------|-------|
| Nb of participants with symptoms | 217  |       | 143   |        | 97   |        | 65      |       |
| Fever                            | 138  | 63.6% | 7     | 4.9%   | 3    | 3%     | 1       | 1.5%  |
| Lymph node swelling              | 56   | 25.8% | 10    | 7%     | 5    | 5.2%   | 4       | 6.2%  |
| Loss of taste/smell              | 167  | 77%   | 81    | 56.6%  | 37   | 38.1%  | 26      | 40%   |
| Body aches                       | 186  | 85.7% | 59    | 41.3%  | 36   | 37.1%  | 29      | 44.6% |
| Fatigue                          | 202  | 93.1% | 105   | 73.4%  | 68   | 70.1%  | 49      | 75.4% |
| Sleeping disturbances            | 113  | 52.1% | 61    | 42.66% | 47   | 48.45% | 38      | 58.5% |
| Lack of concentration            | 119  | 54.8% | 81    | 56.6%  | 50   | 51.55% | 40      | 61.5% |
| Anxiety                          | 63   | 29%   | 34    | 23.8%  | 25   | 25.8%  | 21      | 32.3% |
| Depression                       | 36   | 16.9% | 34    | 23.8%  | 25   | 25.8%  | 22      | 33.8% |
| Headache                         | 181  | 83.4% | 54    | 37.8%  | 27   | 27.8%  | 20      | 30.8% |
| Coryza                           | 168  | 77.4% | 25    | 17.5%  | 16   | 16.5%  | 14      | 21.5% |
| Conjunctivitis                   | 19   | 8.7%  | 5     | 3.5%   | 3    | 3.1%   | 2       | 3.1%  |
| Otitis                           | 42   | 19.3% | 14    | 9.8%   | 10   | 10.3%  | 9       | 13.8% |
| Dyspnea                          | 148  | 68.2% | 87    | 60.8%  | 59   | 60.8%  | 44      | 67.7% |
| Sore throat                      | 141  | 65%   | 24    | 16.8%  | 10   | 10.3%  | 9       | 13.8% |
| Cough                            | 166  | 76.5% | 51    | 35.7%  | 23   | 23.7%  | 17      | 26.2% |
| Angina                           | 125  | 57.6% | 54    | 37.8%  | 37   | 38.1%  | 29      | 44.6% |
| Heart complaints                 | 46   | 21.2% | 29    | 20.3%  | 25   | 25.8%  | 21      | 32.3% |
| Dizziness                        | 109  | 50.2% | 48    | 33.6%  | 29   | 29.9%  | 26      | 40%   |
| Abdominal pain                   | 48   | 22.1% | 15    | 10.5%  | 11   | 11.3%  | 9       | 13.8% |
| Gastrointestinal compl           | 68   | 31.3% | 23    | 16%    | 17   | 17.5%  | 15      | 23.1% |
| Nausea                           | 41   | 18.9% | 11    | 7.7%   | 8    | 8.3%   | 8       | 12.3% |

w, weeks
